# Supplementary material for: Workshop Safety and Uncertainty
Source: Copernicus journal article supplement (doi:10.5194/sand-1-309-2021), 2021-11-10

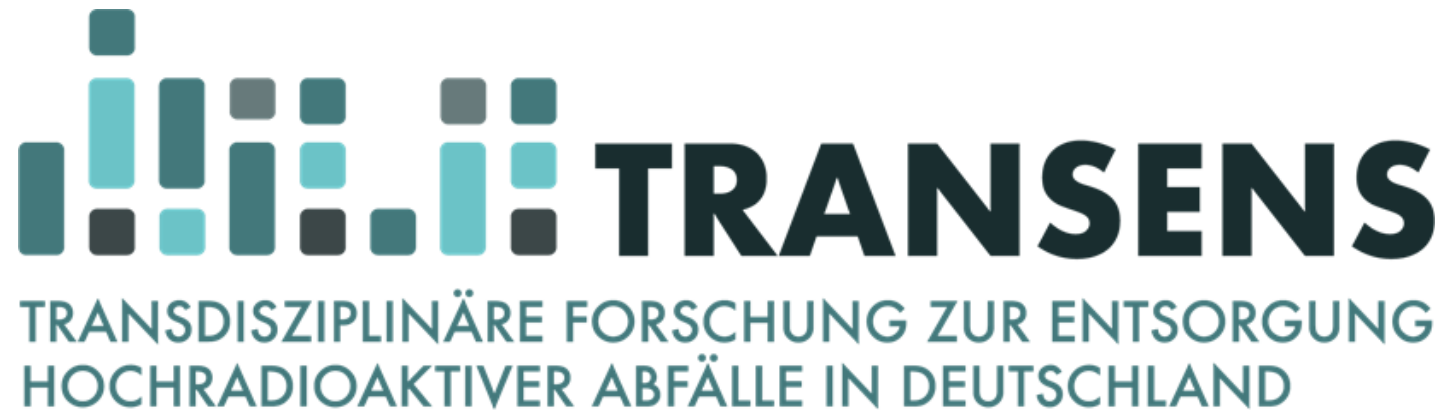

# Uncertainties on the disposal path with regard to the technical barrier - the container system

Dr.-Ing. Thomas Hassel

Institute of Materials Science  
Leibniz University Hanover

safeND - Interdisziplinäre research symposium on the safety of nuclear disposal practices  
Berlin, Westhafen Event & Convention Center – 10.-12.November 2021

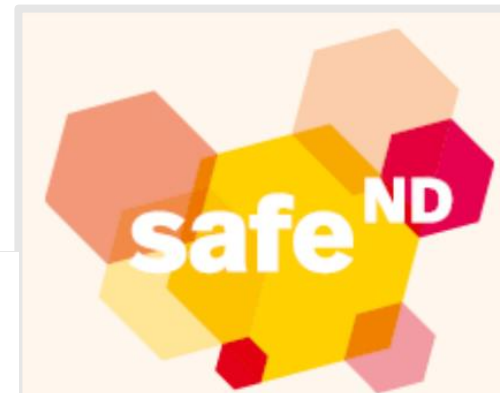

- ☐ Which host rock will be selected in Germany?
- ☐ How should the repository system look like?
  - Longitudinal storage or borehole storage (horizontal or vertical)
  - Containers with self-shielding or without self-shielding
- ☐ How and where will the final repository containers be conditioned?
- ☐ What is the time period between the end of the site selection procedure and the decommissioning of the repository?
- ☐ Which cask materials are available and on what reasons are they selected?
  - Steel or cast iron
  - Corrosion-resistant cladding to fulfil the long-term safety verification (e.g. copper)
- ☐ In what manner can knowledge of the international state of the art be used in the national procedure?
  - Is copper really the best material or can modern alloys be better?
  - Which steels should really be selected (manufacturability, weldability, corrosion resistance)
  - Which environmental influences are relevant for the sites to be selected in Germany (corrosion rate)
- ☐ ...

- ☐ Which host rock will be selected in Germany?
  - ☐ How should the repository system look like?
    - Longitudinal storage or borehole storage (horizontal or vertical)
    - Containers with self-shielding or without self-shielding
  - ☐ How and where will the final repository containers be conditioned?
- ☐ What is the time period between the end of the site selection procedure and the decommissioning of the repository?
  - ☐ Which cask materials are available and on what reasons are they selected?
    - Steel or cast iron
    - Corrosion-resistant cladding to fulfil the long-term safety verification (e.g. copper)
  - ☐ In what manner can knowledge of the international state of the art be used in the national procedure?
    - Is copper really the best material or can modern alloys be better?
    - Which steels should really be selected (manufacturability, weldability, corrosion resistance)
    - Which environmental influences are relevant for the sites to be selected in Germany (corrosion rate)
- ☐ ...

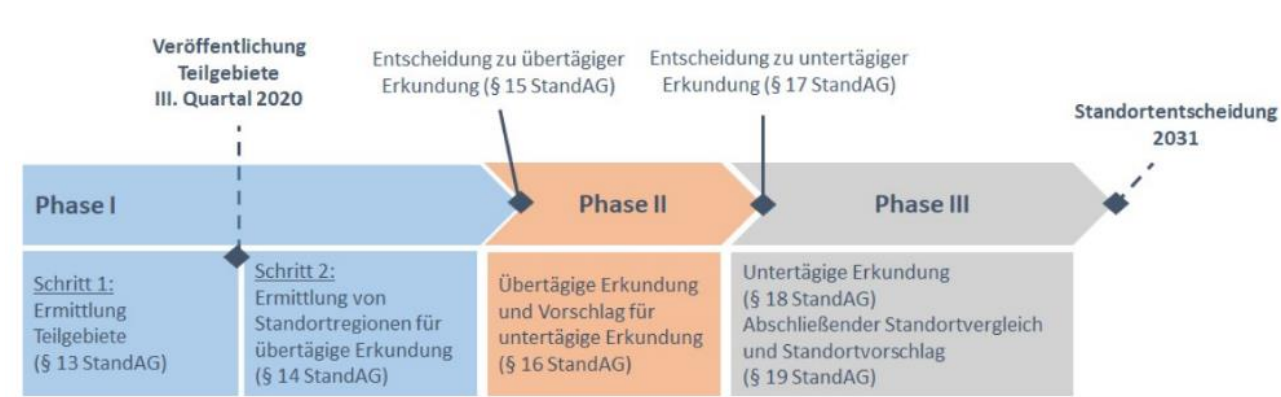

Abbildung 1: Schematische Darstellung der Phasen des Standortauswahlverfahrens.

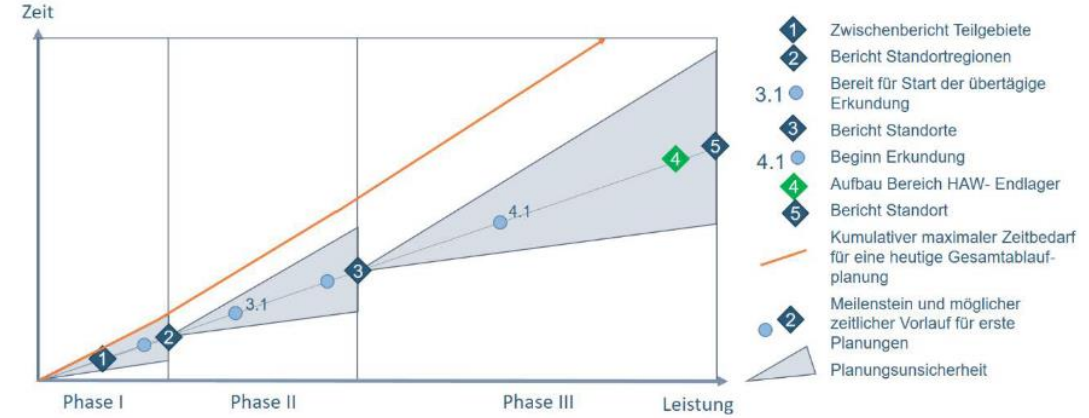

Abbildung 2: Ablaufplanung unter vorheriger Ausweisung von phasenübergreifenden Planaktualisierungen.

**Source:** BGE - Bundesgesellschaft für Endlagerung mbH (2019): Standortauswahlverfahren: Ablaufplanung bis hin zur Standortentscheidung. (Gesamtzeitplanung). [www.bge.de](http://www.bge.de) - download vom 07.06.2021.

| No. | Uncertainties regarding the timeline of the site selection process                                                       | Known? |
|-----|--------------------------------------------------------------------------------------------------------------------------|--------|
| 1   | Date of the location decision and duration of the preparatory periods                                                    | no     |
| 2   | Exploration mine concept depending on host rock formation and repository concept                                         | no     |
| 3   | Number of sites to be explored underground and time required for exploration                                             | no     |
| 4   | Date of the end of Phase III site selection process                                                                      | no     |
| 5   | Estimation of the time required for the preparation of the decision and the decision by the Bundestag and the Bundesrat. | no     |

| No. | Uncertainties regarding the timeline of the site selection process              | Known? |
|-----|---------------------------------------------------------------------------------|--------|
| 6   | Start of planning and construction of the repository                            | no     |
| 7   | Date of approval of the repository                                              | no     |
| 8   | Duration of the storage phase                                                   | no     |
| 9   | Duration of the closure phase                                                   | no     |
| 10  | Duration of the retrievability phase and the decommissioning phase              | no     |
| 11  | Time of decommissioning of the repository and start of the recoverability phase | no     |
| 12  | Recoverability period of 500 years after decommissioning                        | yes    |
| 13  | Definition of the assessment period of 1,000,000 years                          | yes    |

- Sources:**
1. Deutscher Bundestag (2020): Gesetz zur Suche und Auswahl eines Standortes für ein Endlager für hochradioaktive Abfälle. (**Standortauswahlgesetz - StandAG**), vom 05.05.2017, zuletzt geändert durch Art. 1 G v. 07.12.2020 I 2760. Online verfügbar unter [www.gesetze-im-internet.de](http://www.gesetze-im-internet.de).
  2. Bundesministerium für Umwelt, Naturschutz und nukleare Sicherheit (BMU) (Mai 2020): Verordnung über Sicherheitsanforderungen und vorläufige Sicherheitsuntersuchungen für die Endlagerung hochradioaktiver Abfälle. **EndlaSiAnfV**, vom 19/19291.
  3. Bundesministerium für Umwelt, Naturschutz und nukleare Sicherheit (BMU) (Mai 2020): Verordnung über Sicherheitsanforderungen und vorläufige Sicherheitsuntersuchungen für die Endlagerung hochradioaktiver Abfälle. **EndlaSiUntV**, vom 19/19291.

**First and foremost, a repository must remain sealed for a very long time in order to prevent the radioactive inventory from escaping into its environment.**

**→ The most important function is therefore the barrier function!**

1. Repository container materials offer safety against rust-through  
→ Corrosion resistance for  $t > 1,000,000$  years  
(e.g. as an essential barrier in crystalline rock)  
Without an effective containment zone
2. Repository container design hermetically encloses the inventory  
→ Corrosion resistance as good as possible  
(z.B. as a further barrier in the salt or clay rock)  
With an effective containment zone
3. Repository container design delivers defined functionality  
→ Container can be produced on a large scale and cost effectively  
Container is hermetically sealable  
Container is retrievable and recoverable  
Container fulfils the safety criteria in the assessment period  
Container fits into the repository system (technical, geotechnical and geological barriers)

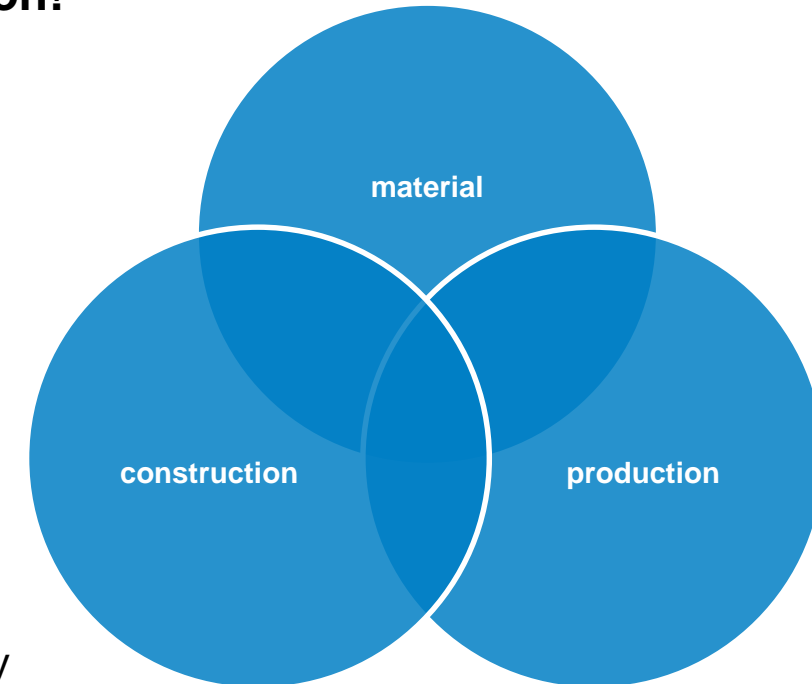

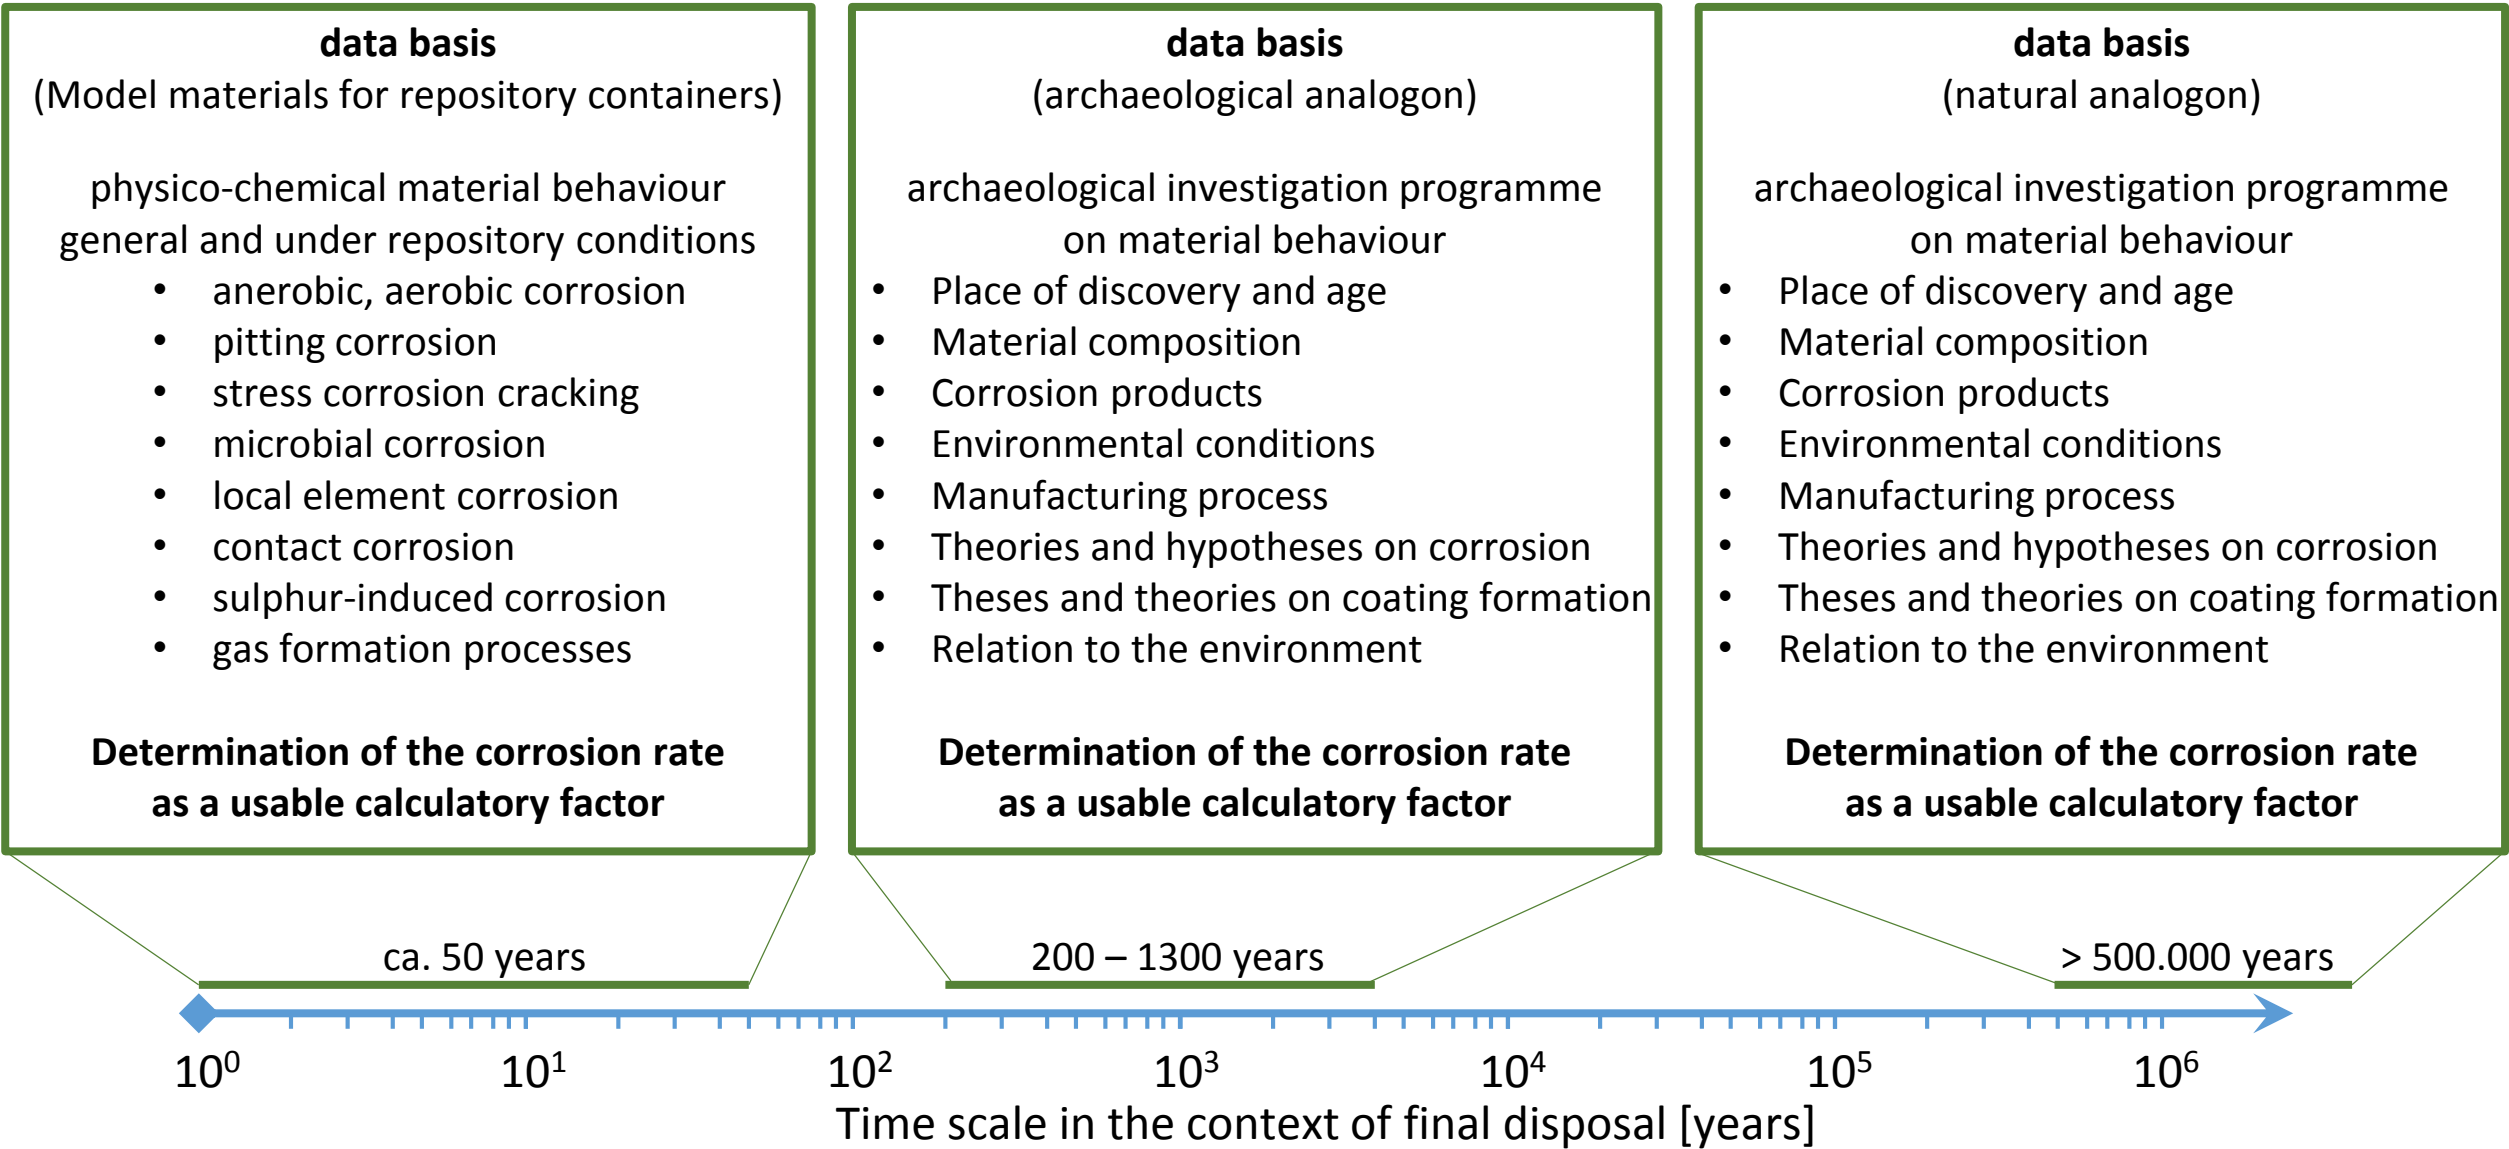

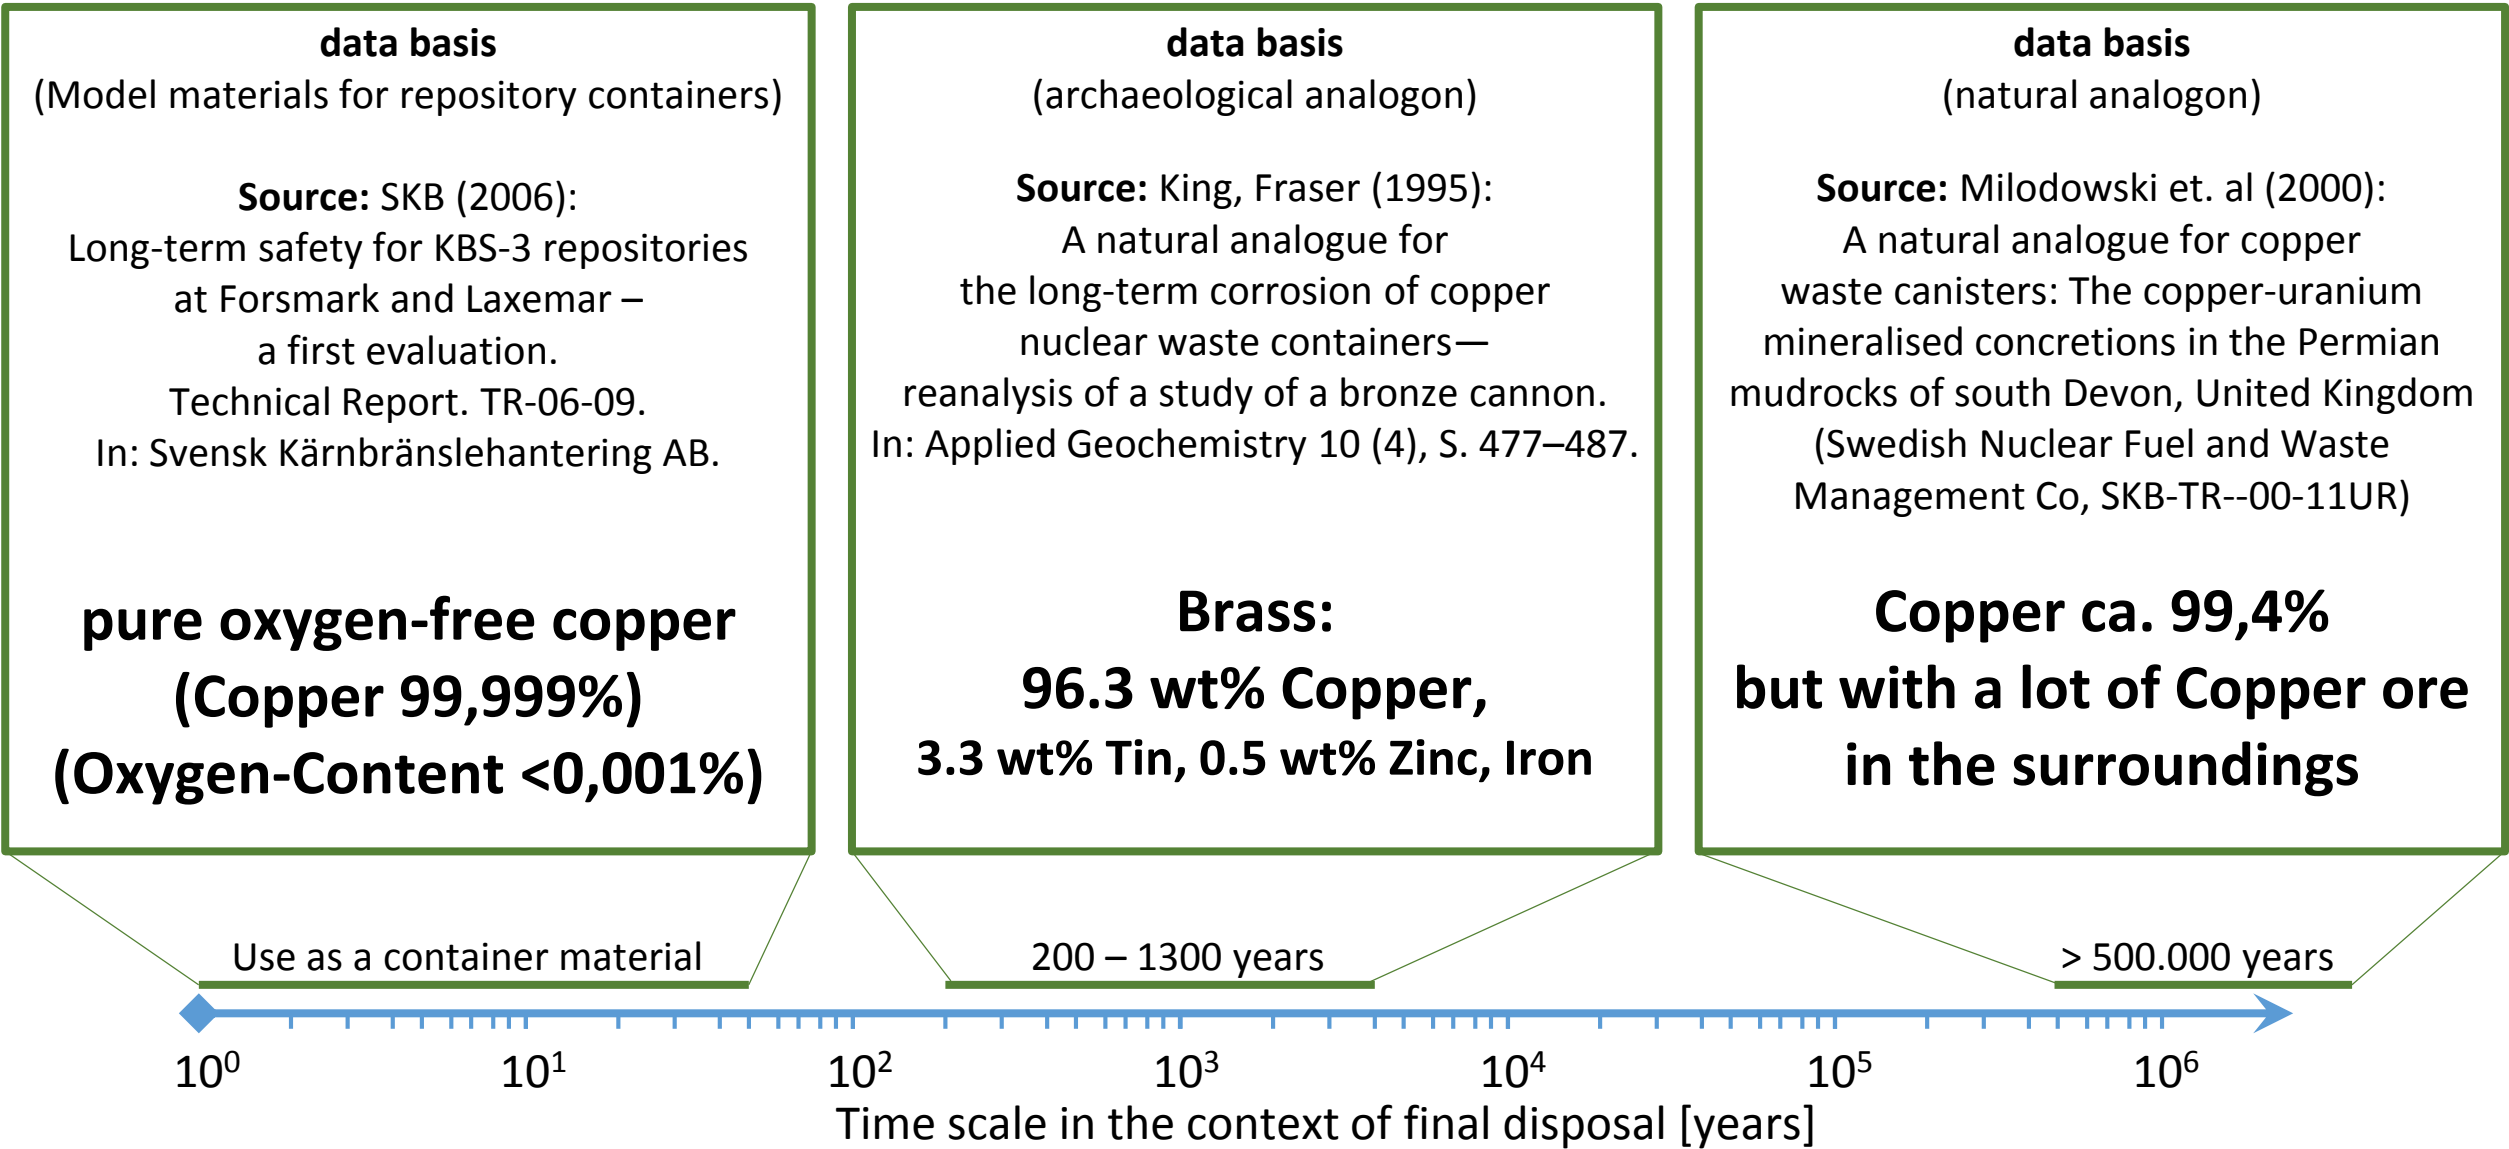

## ➤ Research into the use of copper has been going on in Sweden since about 1978

Source:

Scully, J. R.; Feron, D.; Hanninen, H. (2016): Review of the NWMO copper corrosion program (Nuclear Waste Management Organization (NWMO), NWMO-TR--2016-11UR

## ➤ Research into the use of steel has been going on in Switzerland since about 1989

Source:

Simpson, J. P.; Vallotton, P.-H. (1989):

Experiments on container materials for Swiss high-level waste disposal projects Part III. Technical Report 86-25

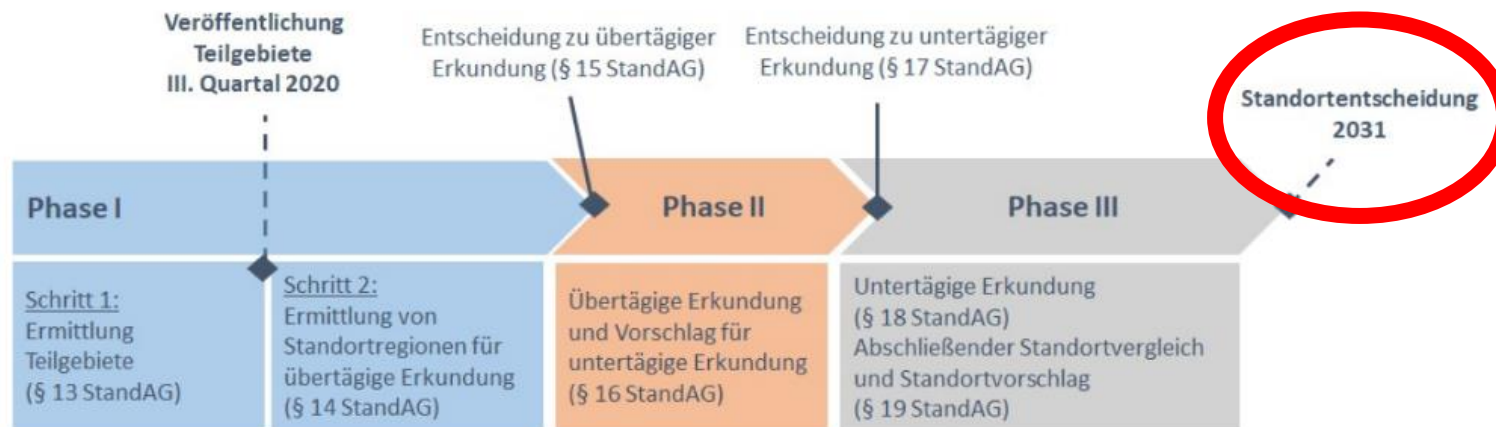

Source:

BGE - Bundesgesellschaft für Endlagerung mbH (2019):  
Standortauswahlverfahren:  
Ablaufplanung bis hin zur Standortentscheidung.  
(Gesamtzeitplanung).  
[www.bge.de](http://www.bge.de) - download vom 07.06.2021.

Abbildung 1: Schematische Darstellung der Phasen des Standortauswahlverfahrens.

## ➤ Research into the use of cast iron and steel as container material in the 1980ies

Included in the Preliminary safety analysis for the Gorleben site (VSG)

- **Bollingerfehr, Wilhelm (2011):** Endlagerkonzepte. [Bericht zum Arbeitspaket 5](#) ; vorläufige Sicherheitsanalyse für den Standort Gorleben. Köln (GRS, GRS-272). Online verfügbar unter [https://www.grs.de/sites/default/files/pdf/GRS-272\\_neu.pdf](https://www.grs.de/sites/default/files/pdf/GRS-272_neu.pdf), zuletzt geprüft am 27.01.2021.
- **Wolf, Jens; Behlau, Joachim (BGR); Beuth, Thomas; Bracke, Guido; Bube, Christiane (KIT/INE)., Buhmann, Dieter; Dresbach, Christian (BGR) et al.:** FEP-Katalog für die VSG. Dokumentation. [Bericht zum Arbeitspaket 7](#) - Vorläufige Sicherheitsanalyse für den Standort Gorleben. Online verfügbar unter <https://www.grs.de/sites/default/files/pdf/GRS-283.pdf>, zuletzt geprüft am 27.01.2021.
- **Beuth, Thomas (2012):** Szenarienentwicklung - Methodik und Anwendung. [Bericht zum Arbeitspaket 8](#) ; vorläufige Sicherheitsanalyse für den Standort Gorleben. Gesellschaft für Anlagen- und Reaktorsicherheit. Köln (GRS, GRS-284). Online verfügbar unter [http://www.grs.de/sites/default/files/pdf/GRS-284\\_inkl\\_Anhaenge.pdf](http://www.grs.de/sites/default/files/pdf/GRS-284_inkl_Anhaenge.pdf), zuletzt geprüft am 10.02.2021.
- **Kock, Ingo (2012):** Integritätsanalyse der geologischen Barriere. [Bericht zum Arbeitspaket 9.1](#) ; vorläufige Sicherheitsanalyse für den Standort Gorleben. Köln (GRS, GRS-286). Online verfügbar unter [https://www.grs.de/sites/default/files/pdf/GRS-286\\_cor2\\_web.pdf](https://www.grs.de/sites/default/files/pdf/GRS-286_cor2_web.pdf), zuletzt geprüft am 27.01.2021.
- **Laure, J.; Baltes, B.; Fischer, H.; Frieling, G.; Kock, I.; Navarro, M.; Seher, H. (2013):** Radiologische Konsequenzenanalyse. [Bericht zum Arbeitspaket 10](#). Vorläufige Sicherheitsanalyse für den Standort Gorleben (GRS-289). Online verfügbar unter [https://www.grs.de/sites/default/files/pdf/GRS-289\\_corr%20\\_0.pdf](https://www.grs.de/sites/default/files/pdf/GRS-289_corr%20_0.pdf), zuletzt geprüft am 10.02.2021.
- **Peiffer, Frank; McStocker, Brigitta (2012):** Einschätzung betrieblicher Machbarkeit von Endlagerkonzepten. [Bericht zum Arbeitspaket 12](#) ; vorläufige Sicherheitsanalyse für den Standort Gorleben. Köln (GRS, GRS-279). Online verfügbar unter [https://www.grs.de/sites/default/files/pdf/GRS-279\\_neu.pdf](https://www.grs.de/sites/default/files/pdf/GRS-279_neu.pdf), zuletzt geprüft am 27.01.2021.

## ➤ Research into the use of cast iron and steel as container material in the 1980ies

Results of the Preliminary safety analysis for the Gorleben site (VSG)

| Storage option B1                                                | Storage option B2                                                                                                    | Storage option C                                                 |
|------------------------------------------------------------------|----------------------------------------------------------------------------------------------------------------------|------------------------------------------------------------------|
| POLLUX®-9 und 10<br>CASTOR® THTR/AVR und KNK<br>CASTOR® MTR2     | CASTOR® V/19; CASTOR® V/52<br>CASTOR® 440/84; CASTOR® HAW 20/28 CG<br>und TS28V; TN85 und TGC 36<br>CASTOR® HAW 28 M | Brennstabkokillen (BSK)<br>Triple-Pack<br>modifizierte BSK       |
| Self-shielding containers in line storage                        | Use of the TLB self-shielding in horizontal<br>wellbore storage                                                      | Deep, vertical borehole storage                                  |
| Requirements for the containers according to VSG                 |                                                                                                                      |                                                                  |
| • Stability, tightness, transportability, handling,<br>corrosion | • Stability, tightness, transportability, handling,<br>corrosion                                                     | • Stability, tightness, transportability, handling,<br>corrosion |
| Proof not provided                                               | Proof not provided                                                                                                   | Proof not provided                                               |

# How do we achieve at a best possible repository container?

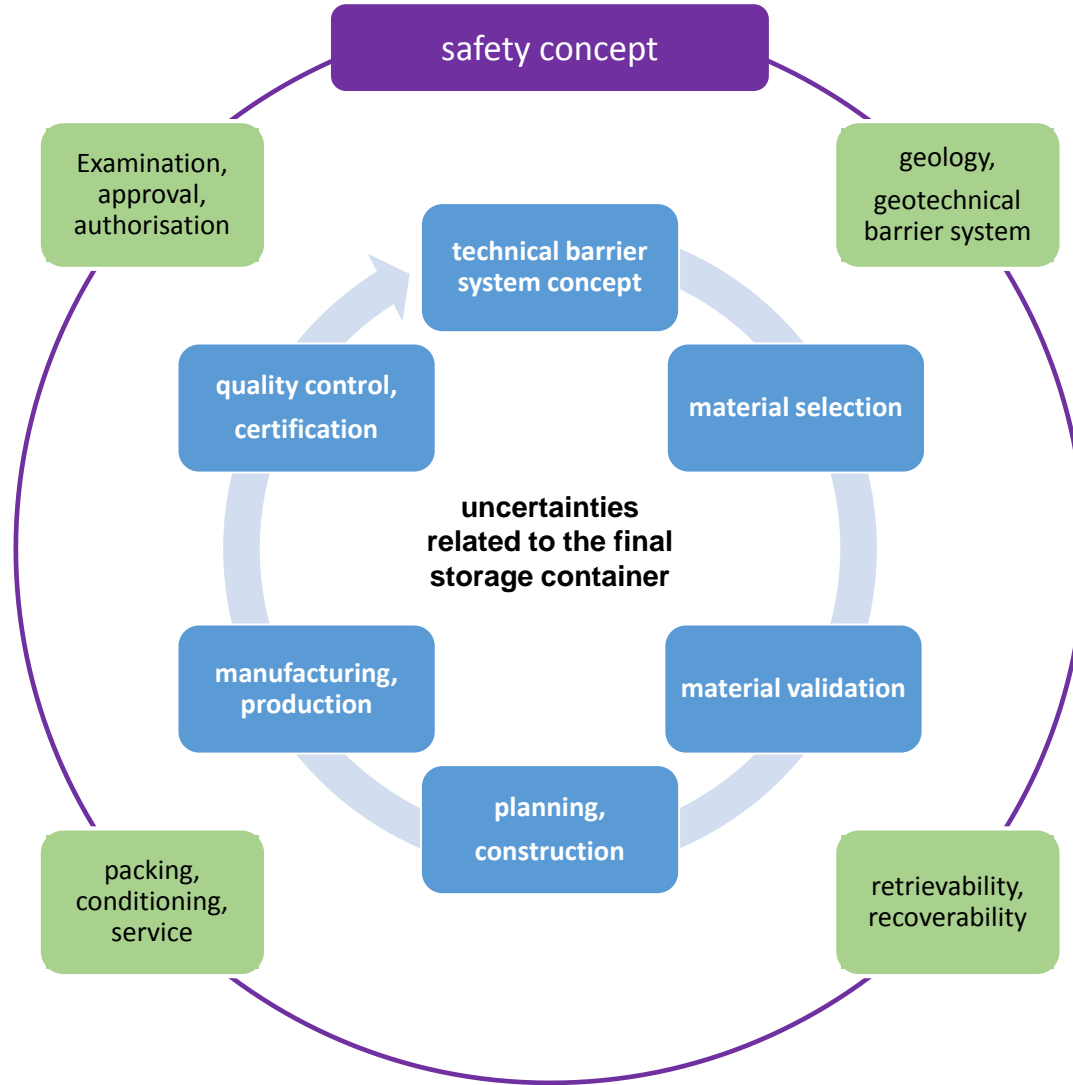

- ❑ The final storage container is an important component in the disposal path.
- ❑ The disposal path begins far before the site selection, namely during interim storage.
- ❑ A clear temporal context is important for cask development.
- ❑ Concept and material selection are by far not all that needs to be done for container development.
- ❑ Uncertainties must be resolved in parallel with the site selection process so that the container does not become the "bottle neck" of final disposal.
- ❑ Everything that is conceptually possible must be started now in order to be able to be implemented concretely after the site selection.

The report will be available shortly! ➔

# Many thanks for your attention!

Gefördert durch:

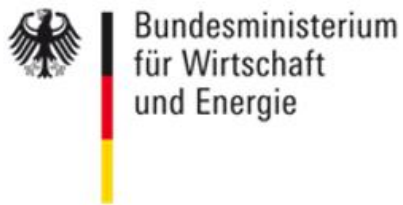

aufgrund eines Beschlusses  
des Deutschen Bundestages

Gefördert im  
Niedersächsischen Vorab der Volkswagenstiftung

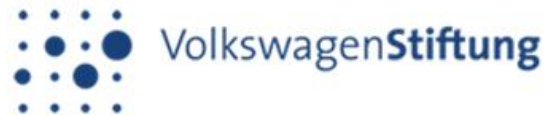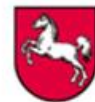

Niedersächsisches Ministerium  
für Wissenschaft und Kultur

Förderkennzeichen: 02E11849A-J

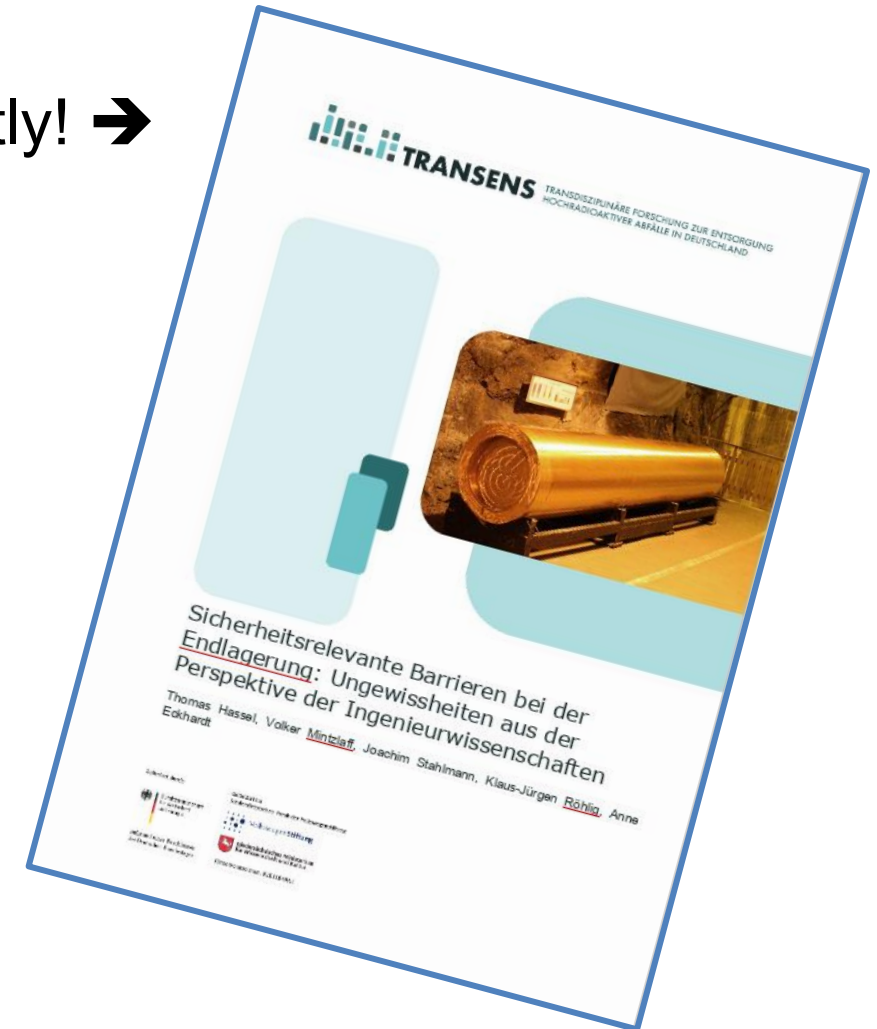

Supplement: Supplementary file 1 [file sand-1-309-2021-supplement.zip › 01_Eckhardt-Hassel WS_V_(sand-2021-95).pdf]
