# Supplementary material for: Workshop Safety and Uncertainty
Source: Copernicus journal article supplement (doi:10.5194/sand-1-309-2021), 2021-11-10

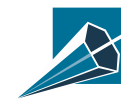

**IGG**  
Institute for Geomechanics  
and Geotechnics

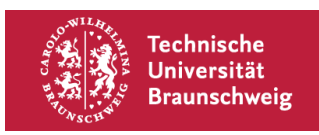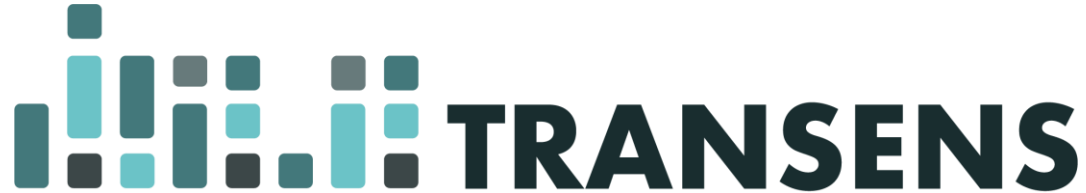

TRANSDISZIPLINÄRE FORSCHUNG ZUR ENTSORGUNG  
HOCHRADIOAKTIVER ABFÄLLE IN DEUTSCHLAND

# Uncertainties in regard to the geological and geotechnical Barriers

Volker Mintzlaff, Joachim Stahlmann  
Institute for Geomechanics und Geotechnics

SafeND – Workshop WS5, Berlin, 10.-12.11.2021

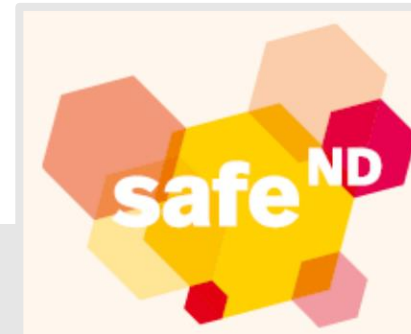

# Complexity of HAW-repositories

- Thermal, mechanical, hydraulic and chemical processes and their interaction
- Multi-barrier system
- Uniqueness of each repository
  - No experience with the entire system
  - Experience available with parts in
    - Underground laboratories
    - Low-level Waste Disposal Sites
    - Laboratory testing, etc....

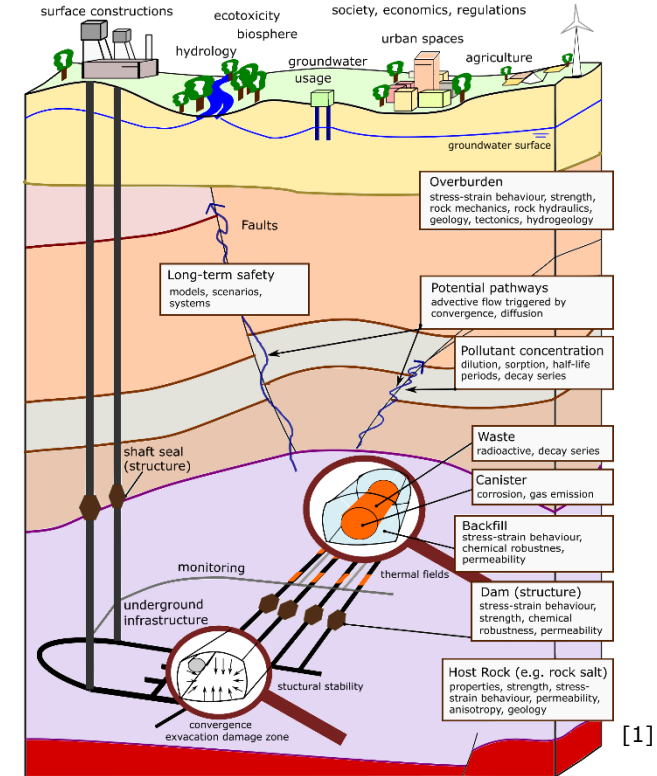

[1]

# Uncertainties caused by modelling (1/2)

- Reality is simplified by modeling
- Reality
  - physical model
  - mathematical model
  - engineering model
- Simplification due to the model's objective

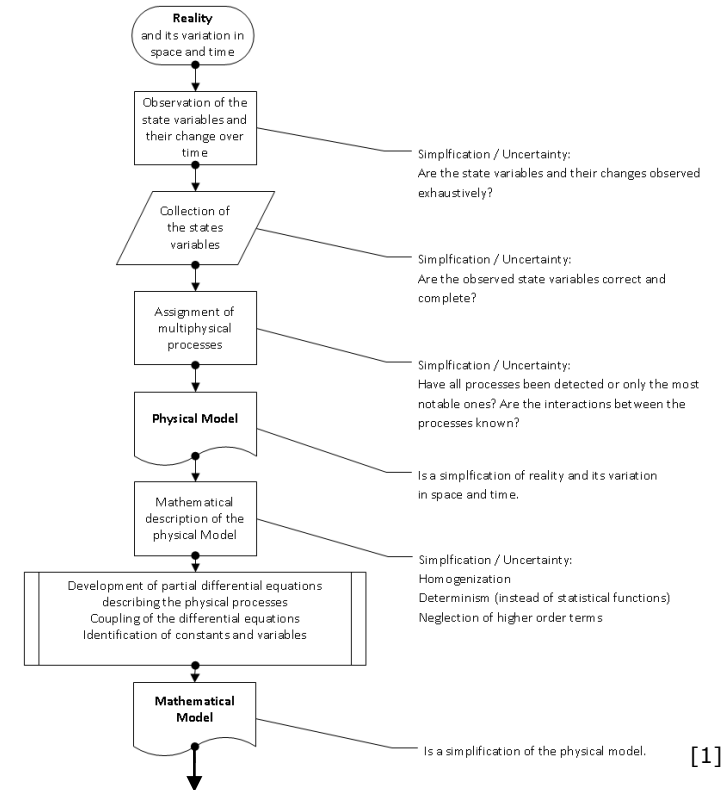

# Uncertainties caused by modelling (2/2)

- The resulting engineering model is optimized for its purpose

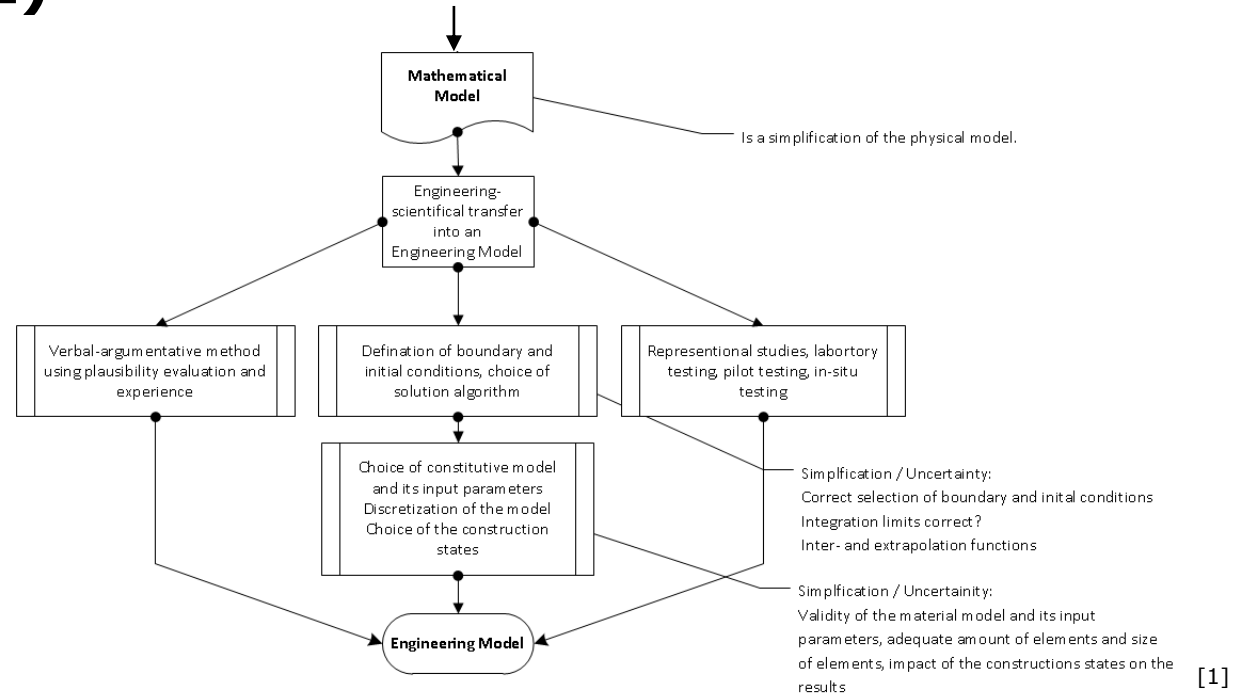

[1]

# Regimes of Uncertainties

- Overview of various uncertainties fields addressed in the report
- For example: fault zones

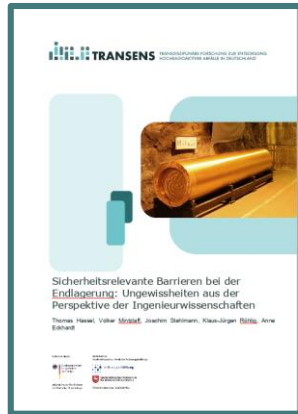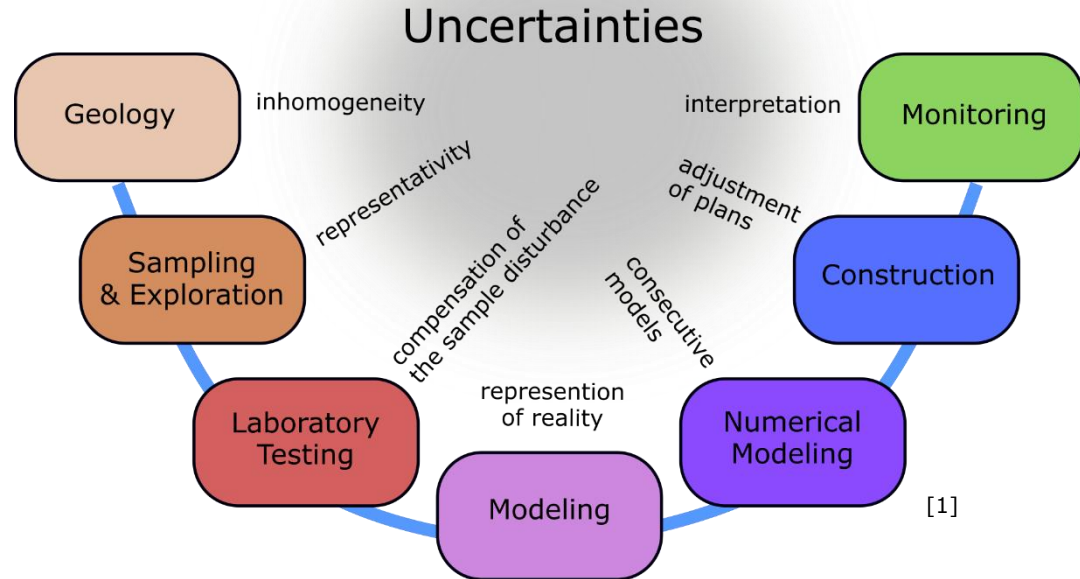

# Scenario: Undetected Fault Zone

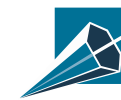

- Sometimes detecting faults is difficult
- Faults can be orientated in the same direction as the drift and can not be detected from inside the drift

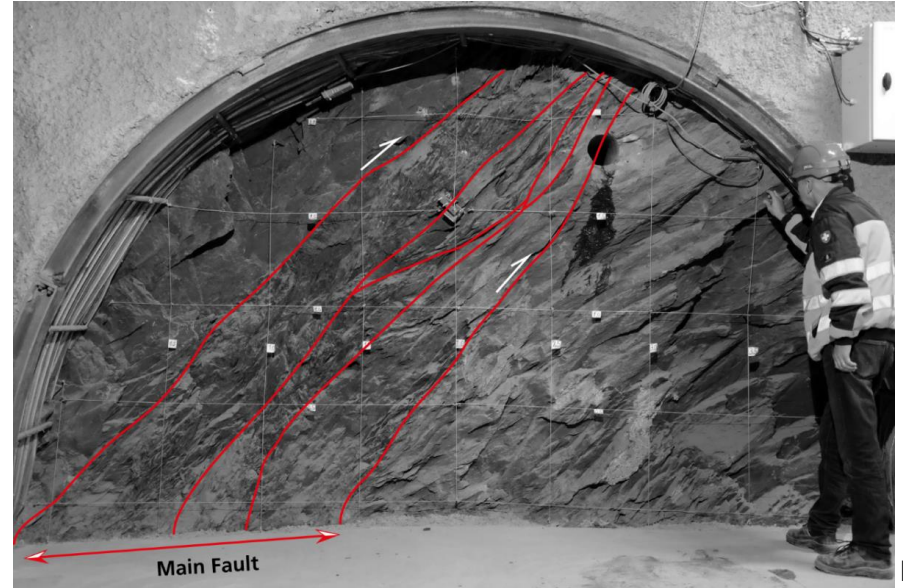

[2]

Example: Main Fault in Mont Terri (CH)

# Scenario: Failure of the lining

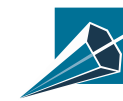

Repository in clay rock, infrastructure drift, 40 years operational time required

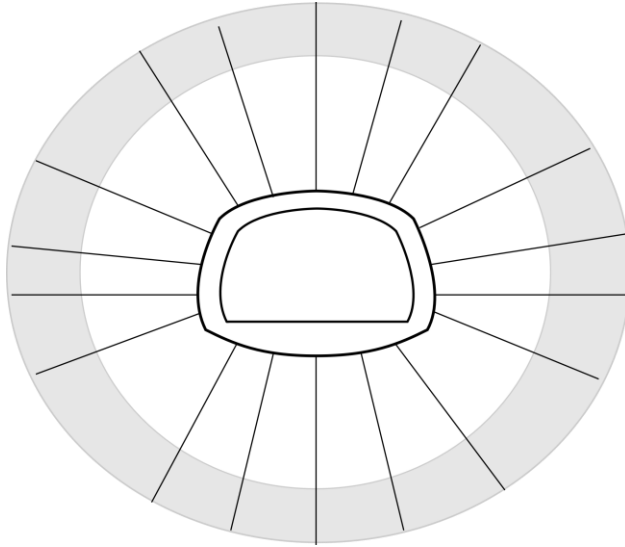

Lining with rock bolts

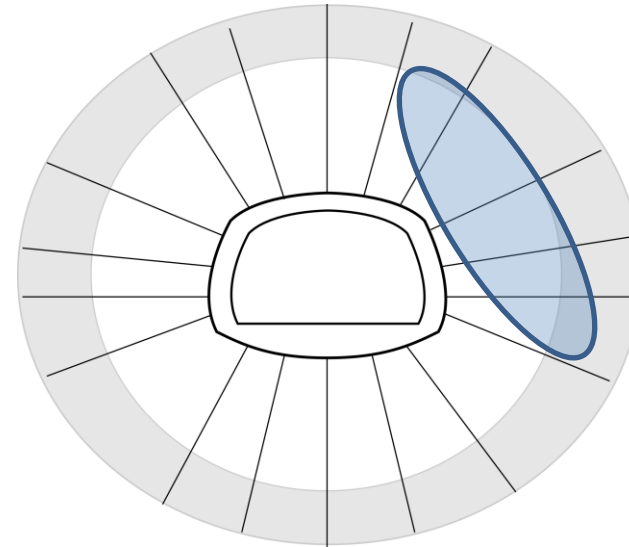

Rock bolt failure

# Cause: Undetected Fault Zone



Repository in clay rock, infrastructure drift, 40 years operational time required

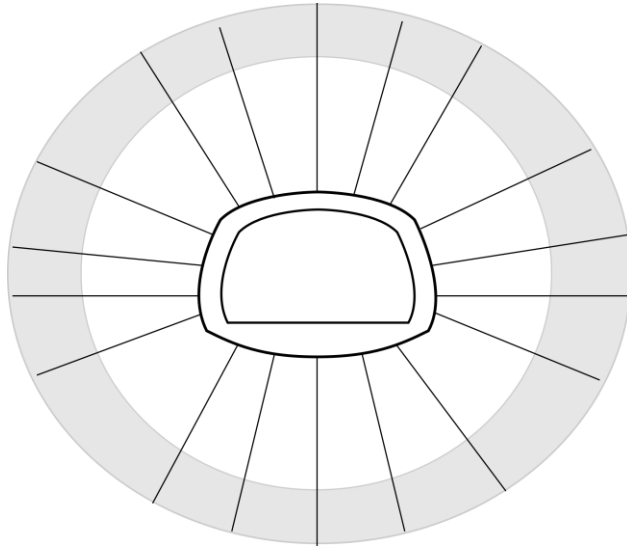

Lining with rock bolts

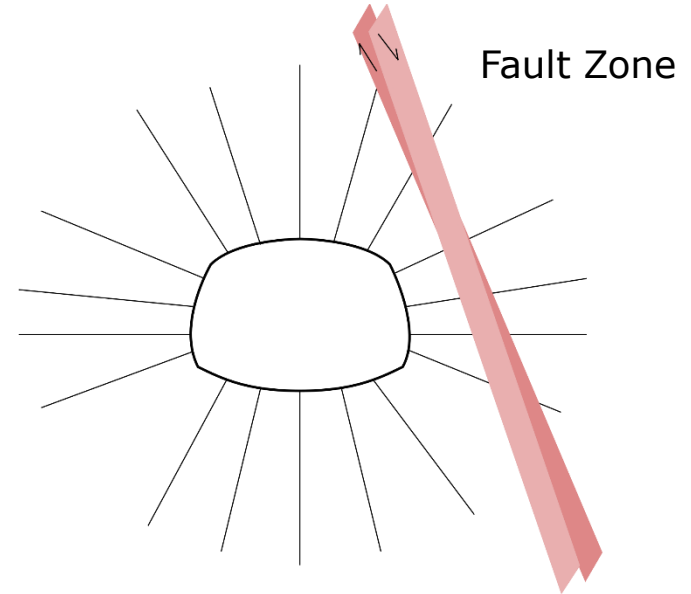

# Scenario: Undetected Fault Zone

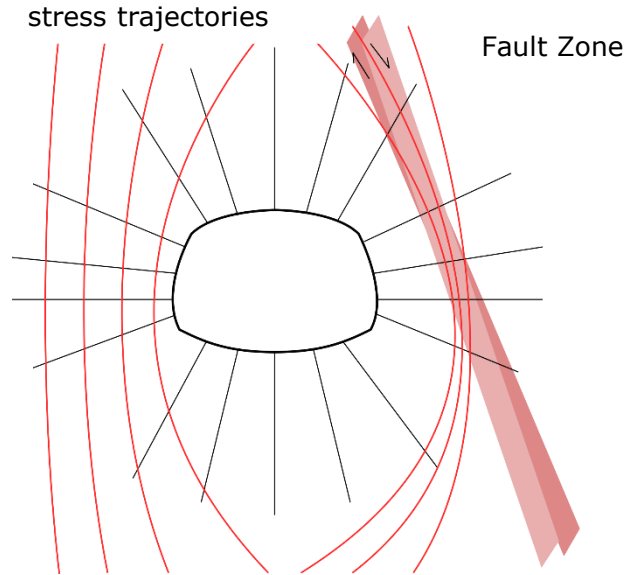

Stress redistribution due to the  
infrastructure drift and fault zone

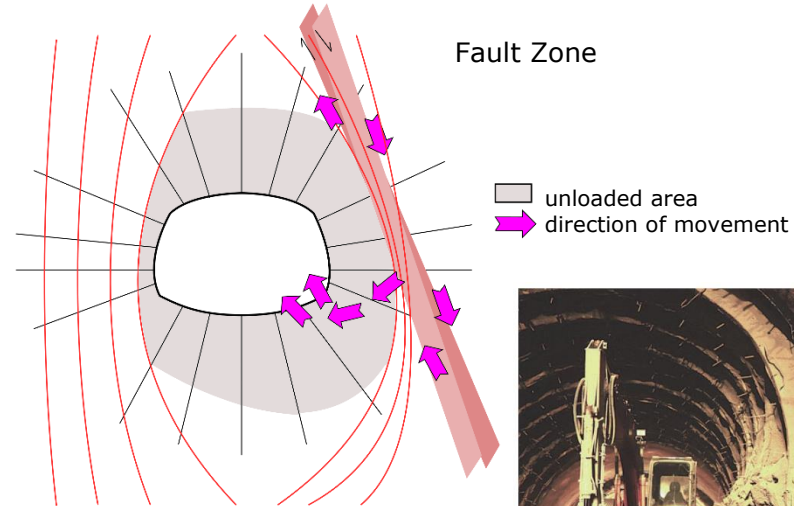

Resulting displacements

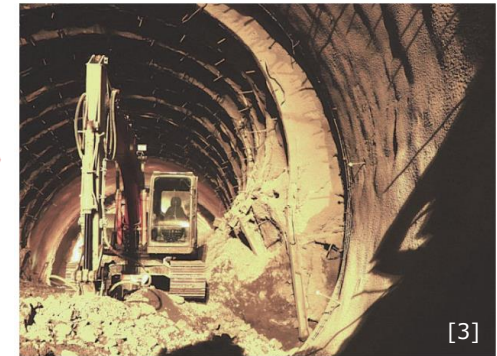

# Conclusion

- Dealing with uncertainties in underground engineering requires flexibility: „it is dark in front of the pickaxe“

- A conflict field can be identified:

Binding regulations by laws, standards, plans, etc.

vs.

Requirement for adaption because of differences between model  
and the observed development of the repository

- If an adaption of the plan is needed, one can not conclude that the selected site is not suitable as repository site

„There is nothing certain, but the uncertain“  
- proverb -

The report will be available shortly! →

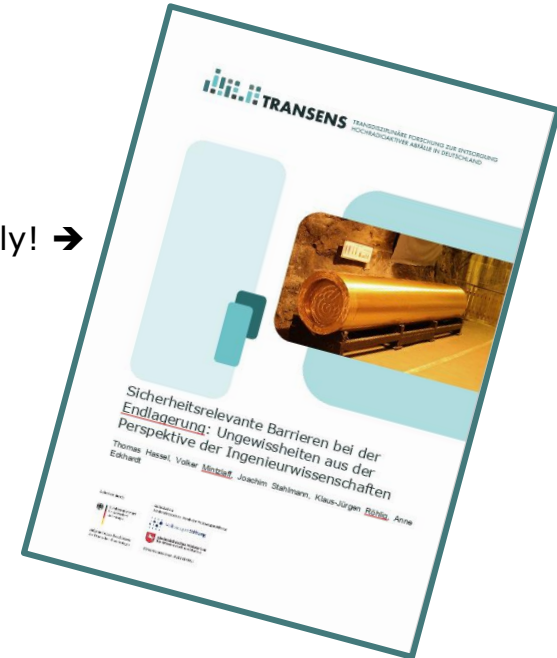

Gefördert durch:

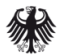

Bundesministerium  
für Wirtschaft  
und Energie

aufgrund eines Beschlusses  
des Deutschen Bundestages

Gefördert im  
Niedersächsischen Vorab der Volkswagenstiftung

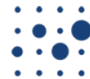

**VolkswagenStiftung**

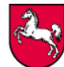

**Niedersächsisches Ministerium  
für Wissenschaft und Kultur**

Förderkennzeichen: 02E11849A-J

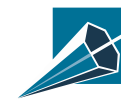

[1] Hassel, T.; Mintzlaff, V.; Stahlmann, J.; Röhlig, K.-J.; Eckhardt, A.: Sicherheitsrelevante Barrieren bei der Endlagerung: Ungewissheiten aus der Perspektive der Ingenieurwissenschaften. TRANSENS-Bericht-4 [in review]

[2] <https://www.mont-terri.ch/de/geologie/geologische-strukturen.html>

[3] Schubert, P.: Thirra Tunnel Albanien – mit einem klaren Konzept zum Erfolg. Geomechanics and Tunnelling 6 (2013), No. 1

# Interpolation: Geological Model

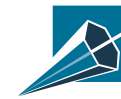

There are three drillings with alternating layers of two rocks.  
How would you interpolate?

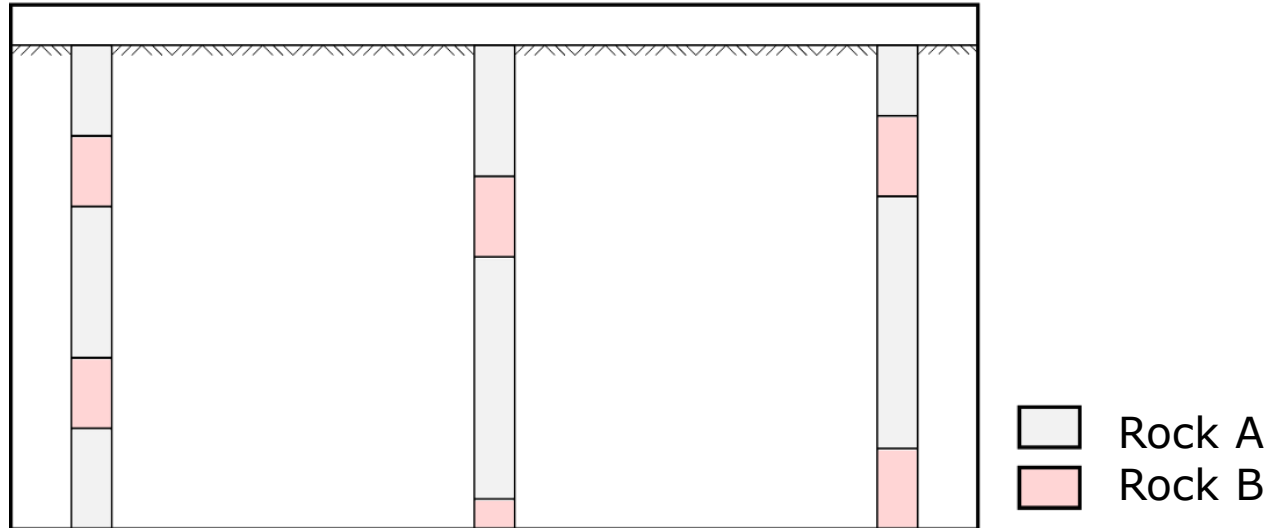

# Interpolation: Geological Model



Four fast interpolations:

a) Layers

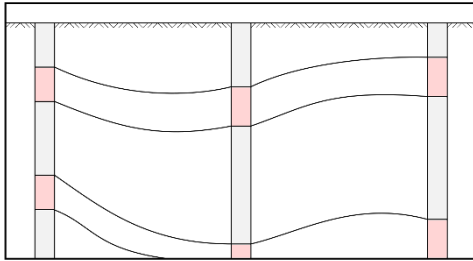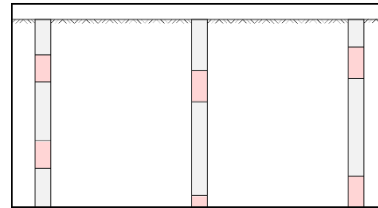

□ Rock A  
□ Rock B

d) over-tilted fold...

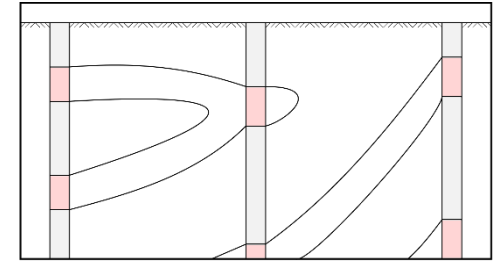

b) The reverse fault

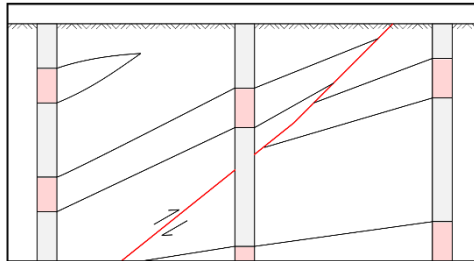

c) Lenticles of rock B

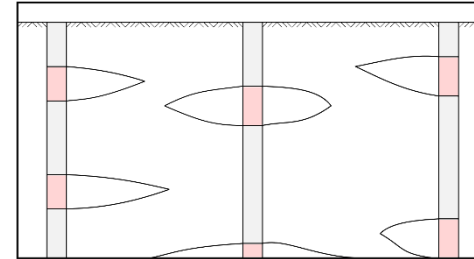

Supplement: Supplementary file 1 [file sand-1-309-2021-supplement.zip › 02_Mintzlaff WS_V_(sand-2021-95).pdf]
