# Supplementary material for: Workshop Safety and Uncertainty
Source: Copernicus journal article supplement (doi:10.5194/sand-1-309-2021), 2021-11-10
Supplement: Supplementary file 1 [file sand-1-309-2021-supplement.zip]

Archive with 3 entries (3 files):
- 01_Eckhardt-Hassel WS_V_(sand-2021-95).pdf
- sand-1-309-2021-supplement-title-page.pdf
- 02_Mintzlaff WS_V_(sand-2021-95).pdf
