# Supplementary material for: Workshop Safety and Uncertainty
Source: Copernicus journal article supplement (doi:10.5194/sand-1-309-2021), 2021-11-10
Supplement: Supplementary file 1 [file sand-1-309-2021-supplement.zip › sand-1-309-2021-supplement-title-page.pdf]

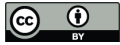

## *Supplement of* **Workshop Safety and Uncertainty**

**Thomas Hassel et al.**

*Correspondence to:* Anne Eckhardt ([anne.eckhardt@risicare.ch](mailto:anne.eckhardt@risicare.ch))

- sand-1-309-2021-supplement-title-page.pdf
- 01\_Eckhardt-Hassel WS\_V\_(sand-2021-95).pdf
- 02\_Mintzlaff WS\_V\_(sand-2021-95).pdf

The copyright of individual parts of the supplement might differ from the article licence.
